# Supplementary material for: Safety and Immunogenicity of the Monovalent Omicron XBB.1.5-Adapted BNT162b2 COVID-19 Vaccine in Individuals ≥12 Years Old: A Phase 2/3 Trial
Source: MDPI journal article supplement (doi:10.3390/vaccines12020118), 2024-01-24

## Supplementary Material

**Table S1.** Severity grading scale for local reactions and systemic events.

|                | Mild                             | Moderate                        | Severe                          |
|----------------|----------------------------------|---------------------------------|---------------------------------|
| Local reaction |                                  |                                 |                                 |
| Pain           | Does not interfere with activity | Interferes with activity        | Prevents daily activity         |
| Redness        | >2.0–5.0 cm                      | >5.0–10.0 cm                    | >10 cm                          |
| Swelling       | >2.0–5.0 cm                      | >5.0–10.0 cm                    | >10 cm                          |
| Systemic event |                                  |                                 |                                 |
| Vomiting       | 1–2 × in 24 h                    | >2 × in 24 h                    | Requires IV hydration           |
| Diarrhea       | 2–3 loose stools in 24 h         | 4–5 loose stools in 24 h        | ≥6 loose stools in 24 h         |
| Headache       | Does not interfere with activity | Some interference with activity | Prevents daily routine activity |
| Fatigue        | Does not interfere with activity | Some interference with activity | Prevents daily routine activity |
| Chills         | Does not interfere with activity | Some interference with activity | Prevents daily routine activity |
| Muscle pain    | Does not interfere with activity | Some interference with activity | Prevents daily routine activity |
| Joint pain     | Does not interfere with activity | Some interference with activity | Prevents daily routine activity |

IV=intravenous.

For the fever scale, refer to the key of **Figure 3**.

**Table S2.** Medical history reported in >2% of participants overall (safety population)

| <b>System Organ Class<br/>Preferred Term</b> | <b>12–17 Years Old<br/>(N<sup>a</sup>=30)</b> | <b>18–55 Years Old<br/>(N<sup>a</sup>=174)</b> | <b>&gt;55 Years Old<br/>(N<sup>a</sup>=208)</b> | <b>Total<br/>(N<sup>a</sup>=412)</b> |
|----------------------------------------------|-----------------------------------------------|------------------------------------------------|-------------------------------------------------|--------------------------------------|
| Any medical history                          | 26 (86.7)                                     | 164 (94.3)                                     | 205 (98.6)                                      | 395 (95.9)                           |
| Cardiac disorders                            | 0                                             | 4 (2.3)                                        | 28 (13.5)                                       | 32 (7.8)                             |
| Coronary artery disease                      | 0                                             | 0                                              | 9 (4.3)                                         | 9 (2.2)                              |
| Endocrine disorders                          | 1 (3.3)                                       | 7 (4.0)                                        | 48 (23.1)                                       | 56 (13.6)                            |
| Hypothyroidism                               | 0                                             | 3 (1.7)                                        | 37 (17.8)                                       | 40 (9.7)                             |
| Eye disorders                                | 2 (6.7)                                       | 5 (2.9)                                        | 60 (28.8)                                       | 67 (16.3)                            |
| Cataract                                     | 0                                             | 0                                              | 26 (12.5)                                       | 26 (6.3)                             |
| Myopia                                       | 1 (3.3)                                       | 4 (2.3)                                        | 21 (10.1)                                       | 26 (6.3)                             |
| Presbyopia                                   | 0                                             | 0                                              | 24 (11.5)                                       | 24 (5.8)                             |
| Gastrointestinal disorders                   | 0                                             | 19 (10.9)                                      | 69 (33.2)                                       | 88 (21.4)                            |
| Gastroesophageal reflux disease              | 0                                             | 14 (8.0)                                       | 37 (17.8)                                       | 51 (12.4)                            |
| Inguinal hernia                              | 0                                             | 3 (1.7)                                        | 6 (2.9)                                         | 9 (2.2)                              |
| Hepatobiliary disorders                      | 0                                             | 4 (2.3)                                        | 15 (7.2)                                        | 19 (4.6)                             |
| Cholelithiasis                               | 0                                             | 2 (1.1)                                        | 8 (3.8)                                         | 10 (2.4)                             |
| Immune system disorders                      | 9 (30.0)                                      | 66 (37.9)                                      | 64 (30.8)                                       | 139 (33.7)                           |
| Drug hypersensitivity                        | 3 (10.0)                                      | 21 (12.1)                                      | 26 (12.5)                                       | 50 (12.1)                            |
| Food allergy                                 | 1 (3.3)                                       | 3 (1.7)                                        | 5 (2.4)                                         | 9 (2.2)                              |
| Seasonal allergy                             | 5 (16.7)                                      | 47 (27.0)                                      | 41 (19.7)                                       | 93 (22.6)                            |
| Infections and infestations                  | 7 (23.3)                                      | 63 (36.2)                                      | 88 (42.3)                                       | 158 (38.3)                           |
| Appendicitis                                 | 1 (3.3)                                       | 2 (1.1)                                        | 11 (5.3)                                        | 14 (3.4)                             |
| COVID-19                                     | 5 (16.7)                                      | 60 (34.5)                                      | 67 (32.2)                                       | 132 (32.0)                           |
| Tonsillitis                                  | 0                                             | 3 (1.7)                                        | 6 (2.9)                                         | 9 (2.2)                              |

|                                                                     |          |           |            |            |
|---------------------------------------------------------------------|----------|-----------|------------|------------|
| Investigations                                                      | 5 (16.7) | 13 (7.5)  | 21 (10.1)  | 39 (9.5)   |
| SARS-CoV-2 test positive                                            | 4 (13.3) | 5 (2.9)   | 1 (0.5)    | 10 (2.4)   |
| Metabolism and nutrition disorders                                  | 3 (10.0) | 57 (32.8) | 137 (65.9) | 197 (47.8) |
| Dyslipidemia                                                        | 0        | 4 (2.3)   | 15 (7.2)   | 19 (4.6)   |
| Glucose tolerance impaired                                          | 0        | 3 (1.7)   | 9 (4.3)    | 12 (2.9)   |
| Hypercholesterolemia                                                | 0        | 8 (4.6)   | 38 (18.3)  | 46 (11.2)  |
| Hyperlipidemia                                                      | 0        | 6 (3.4)   | 38 (18.3)  | 44 (10.7)  |
| Obesity                                                             | 3 (10.0) | 27 (15.5) | 37 (17.8)  | 67 (16.3)  |
| Overweight                                                          | 0        | 2 (1.1)   | 13 (6.3)   | 15 (3.6)   |
| Type 2 diabetes mellitus                                            | 0        | 9 (5.2)   | 40 (19.2)  | 49 (11.9)  |
| Musculoskeletal and connective tissue disorders                     | 4 (13.3) | 19 (10.9) | 98 (47.1)  | 121 (29.4) |
| Arthralgia                                                          | 1 (3.3)  | 1 (0.6)   | 16 (7.7)   | 18 (4.4)   |
| Arthritis                                                           | 0        | 1 (0.6)   | 8 (3.8)    | 9 (2.2)    |
| Back pain                                                           | 0        | 6 (3.4)   | 21 (10.1)  | 27 (6.6)   |
| Osteoarthritis                                                      | 0        | 3 (1.7)   | 44 (21.2)  | 47 (11.4)  |
| Osteopenia                                                          | 0        | 0         | 14 (6.7)   | 14 (3.4)   |
| Osteoporosis                                                        | 0        | 1 (0.6)   | 9 (4.3)    | 10 (2.4)   |
| Spinal osteoarthritis                                               | 0        | 2 (1.1)   | 8 (3.8)    | 10 (2.4)   |
| Neoplasms benign, malignant and unspecified (incl cysts and polyps) | 0        | 11 (6.3)  | 47 (22.6)  | 58 (14.1)  |
| Basal cell carcinoma                                                | 0        | 1 (0.6)   | 9 (4.3)    | 10 (2.4)   |
| Breast cancer                                                       | 0        | 2 (1.1)   | 12 (5.8)   | 14 (3.4)   |
| Uterine leiomyoma                                                   | 0        | 3 (1.7)   | 10 (4.8)   | 13 (3.2)   |
| Nervous system disorders                                            | 0        | 19 (10.9) | 44 (21.2)  | 63 (15.3)  |
| Migraine                                                            | 0        | 8 (4.6)   | 11 (5.3)   | 19 (4.6)   |

|                                                 |          |           |            |            |
|-------------------------------------------------|----------|-----------|------------|------------|
| Psychiatric disorders                           | 7 (23.3) | 55 (31.6) | 66 (31.7)  | 128 (31.1) |
| Anxiety                                         | 2 (6.7)  | 26 (14.9) | 27 (13.0)  | 55 (13.3)  |
| Attention deficit hyperactivity disorder        | 4 (13.3) | 16 (9.2)  | 1 (0.5)    | 21 (5.1)   |
| Depression                                      | 1 (3.3)  | 23 (13.2) | 29 (13.9)  | 53 (12.9)  |
| Insomnia                                        | 0        | 9 (5.2)   | 31 (14.9)  | 40 (9.7)   |
| Reproductive system and breast disorders        | 0        | 19 (10.9) | 48 (23.1)  | 67 (16.3)  |
| Benign prostatic hyperplasia                    | 0        | 0         | 15 (7.2)   | 15 (3.6)   |
| Erectile dysfunction                            | 0        | 2 (1.1)   | 11 (5.3)   | 13 (3.2)   |
| Respiratory, thoracic and mediastinal disorders | 5 (16.7) | 25 (14.4) | 59 (28.4)  | 89 (21.6)  |
| Asthma                                          | 2 (6.7)  | 12 (6.9)  | 27 (13.0)  | 41 (10.0)  |
| Chronic obstructive pulmonary disease           | 0        | 1 (0.6)   | 8 (3.8)    | 9 (2.2)    |
| Rhinitis allergic                               | 3 (10.0) | 6 (3.4)   | 16 (7.7)   | 25 (6.1)   |
| Sleep apnea syndrome                            | 0        | 2 (1.1)   | 13 (6.3)   | 15 (3.6)   |
| Skin and subcutaneous tissue disorders          | 6 (20.0) | 18 (10.3) | 22 (10.6)  | 46 (11.2)  |
| Acne                                            | 5 (16.7) | 6 (3.4)   | 0          | 11 (2.7)   |
| Social circumstances                            | 3 (10.0) | 8 (4.6)   | 59 (28.4)  | 70 (17.0)  |
| Postmenopause                                   | 0        | 3 (1.7)   | 53 (25.5)  | 56 (13.6)  |
| Surgical and medical procedures                 | 2 (6.7)  | 67 (38.5) | 121 (58.2) | 190 (46.1) |
| Appendicectomy                                  | 1 (3.3)  | 3 (1.7)   | 11 (5.3)   | 15 (3.6)   |
| Caesarean section                               | 0        | 6 (3.4)   | 6 (2.9)    | 12 (2.9)   |
| Cataract operation                              | 0        | 1 (0.6)   | 12 (5.8)   | 13 (3.2)   |
| Cholecystectomy                                 | 0        | 4 (2.3)   | 12 (5.8)   | 16 (3.9)   |
| Female sterilization                            | 0        | 8 (4.6)   | 6 (2.9)    | 14 (3.4)   |
| Hysterectomy                                    | 0        | 10 (5.7)  | 36 (17.3)  | 46 (11.2)  |
| Skin neoplasm excision                          | 0        | 2 (1.1)   | 10 (4.8)   | 12 (2.9)   |

|                        |         |           |            |            |
|------------------------|---------|-----------|------------|------------|
| Tonsillectomy          | 0       | 4 (2.3)   | 6 (2.9)    | 10 (2.4)   |
| Vasectomy              | 0       | 4 (2.3)   | 9 (4.3)    | 13 (3.2)   |
| Wisdom teeth removal   | 0       | 10 (5.7)  | 1 (0.5)    | 11 (2.7)   |
| Vascular disorders     | 1 (3.3) | 28 (16.1) | 117 (56.3) | 146 (35.4) |
| Essential hypertension | 1 (3.3) | 1 (0.6)   | 14 (6.7)   | 16 (3.9)   |
| Hypertension           | 0       | 25 (14.4) | 92 (44.2)  | 117 (28.4) |

Values are n<sup>b</sup> (%).

<sup>a</sup>Number of participants in the specified group. This value is the denominator for the percentage calculations.

<sup>b</sup>Number of participants with the specified characteristic. Participants with multiple occurrences of the same preferred term are counted only once.

**Table S3.** Participant demographics of the variant neutralization subset

|                                                                                                           | Current study:<br>XBB.1.5-adapted BNT162b2 30 µg |                                       |                               | Comparator group:<br>BA.4/BA.5-adapted BNT162b2 30 µg |                                       |                               |
|-----------------------------------------------------------------------------------------------------------|--------------------------------------------------|---------------------------------------|-------------------------------|-------------------------------------------------------|---------------------------------------|-------------------------------|
|                                                                                                           | 18–55 years old<br>(N <sup>a</sup> =20)          | >55 years old<br>(N <sup>a</sup> =20) | Total<br>(N <sup>a</sup> =40) | 18–55 years old<br>(N <sup>a</sup> =20)               | >55 years old<br>(N <sup>a</sup> =20) | Total<br>(N <sup>a</sup> =40) |
| Sex, n <sup>b</sup> (%)                                                                                   |                                                  |                                       |                               |                                                       |                                       |                               |
| Male                                                                                                      | 12 (60.0)                                        | 7 (35.0)                              | 19 (47.5)                     | 12 (60.0)                                             | 7 (35.0)                              | 19 (47.5)                     |
| Female                                                                                                    | 8 (40.0)                                         | 13 (65.0)                             | 21 (52.5)                     | 8 (40.0)                                              | 13 (65.0)                             | 21 (52.5)                     |
| Race, n <sup>b</sup> (%)                                                                                  |                                                  |                                       |                               |                                                       |                                       |                               |
| White                                                                                                     | 18 (90.0)                                        | 16 (80.0)                             | 34 (85.0)                     | 17 (85.0)                                             | 16 (80.0)                             | 33 (82.5)                     |
| Black or African American                                                                                 | 2 (10.0)                                         | 2 (10.0)                              | 4 (10.0)                      | 1 (5.0)                                               | 3 (15.0)                              | 4 (10.0)                      |
| Other                                                                                                     | 0                                                | 2 (10.0)                              | 2 (5.0)                       | 1 (5.0)                                               | 1 (5.0)                               | 2 (5.0)                       |
| Ethnicity, n <sup>b</sup> (%)                                                                             |                                                  |                                       |                               |                                                       |                                       |                               |
| Hispanic/Latino                                                                                           | 9 (45.0)                                         | 4 (20.0)                              | 13 (32.5)                     | 3 (15.0)                                              | 4 (20.0)                              | 7 (17.5)                      |
| Age at vaccination (years)                                                                                |                                                  |                                       |                               |                                                       |                                       |                               |
| Mean (SD)                                                                                                 | 38.0 (10.04)                                     | 70.1 (6.51)                           | 54.0 (18.30)                  | 37.9 (9.97)                                           | 69.7 (5.95)                           | 53.8 (18.00)                  |
| Median (range)                                                                                            | 35.5 (25–55)                                     | 69.5 (56–82)                          | 55.5 (25–82)                  | 36.0 (25–54)                                          | 69.5 (56–81)                          | 55.0 (25–81)                  |
| Baseline SARS-CoV-2 status, n <sup>b</sup> (%)                                                            |                                                  |                                       |                               |                                                       |                                       |                               |
| Positive <sup>c</sup>                                                                                     | 20 (100.0)                                       | 20 (100.0)                            | 40 (100.0)                    | 20 (100.0)                                            | 20 (100.0)                            | 40 (100.0)                    |
| Time from last dose of mRNA COVID-19 vaccine <sup>d</sup> to the study vaccination (months <sup>e</sup> ) |                                                  |                                       |                               |                                                       |                                       |                               |
| Mean (SD)                                                                                                 | 8.8 (1.98)                                       | 9.6 (2.04)                            | 9.2 (2.03)                    | 11.0 (1.41)                                           | 11.4 (1.16)                           | 11.2 (1.29)                   |
| Median (range)                                                                                            | 8.3 (5.8–12.0)                                   | 10.2 (5.8–11.9)                       | 9.5 (5.8–12.0)                | 11.3 (7.4–12.8)                                       | 11.9 (8.5–12.6)                       | 11.4 (7.4–12.8)               |
| ≥5 to <7 months, n <sup>b</sup> (%)                                                                       | 4 (20.0)                                         | 4 (20.0)                              | 8 (20.0)                      | 0                                                     | 0                                     | 0                             |
| ≥7 to <9 months, n <sup>b</sup> (%)                                                                       | 7 (35.0)                                         | 2 (10.0)                              | 9 (22.5)                      | 3 (15.0)                                              | 1 (5.0)                               | 4 (10.0)                      |
| ≥9 to ≤12 months, n <sup>b</sup> (%)                                                                      | 9 (45.0)                                         | 14 (70.0)                             | 23 (57.5)                     | 13 (65.0)                                             | 10 (50.0)                             | 23 (57.5)                     |
| >12 months, n <sup>b</sup> (%)                                                                            | 0                                                | 0                                     | 0                             | 4 (20.0)                                              | 9 (45.0)                              | 13 (32.5)                     |
| Time from last dose of mRNA COVID-19 vaccine to study vaccination (days)                                  |                                                  |                                       |                               |                                                       |                                       |                               |
| Mean (SD)                                                                                                 | 245.7 (55.35)                                    | 269.5 (57.01)                         | 257.6 (56.75)                 | 306.7 (39.39)                                         | 318.8 (32.39)                         | 312.7 (36.12)                 |
| Median (range)                                                                                            | 233.5 (162–                                      | 285.0 (162–                           | 265.5 (162–                   | 317.0 (207–                                           | 334.5 (239–                           | 320.5 (207–                   |

|                                               | 336)     | 333)     | 336)      | 359)     | 354)      | 359)      |
|-----------------------------------------------|----------|----------|-----------|----------|-----------|-----------|
| BMI, n <sup>b</sup> (%)                       |          |          |           |          |           |           |
| Underweight (<18.5 kg/m <sup>2</sup> )        | 0        | 1 (5.0)  | 1 (2.5)   | 0        | 0         | 0         |
| Normal weight (≥18.5–24.9 kg/m <sup>2</sup> ) | 6 (30.0) | 6 (30.0) | 12 (30.0) | 5 (25.0) | 3 (15.0)  | 8 (20.0)  |
| Overweight (≥25.0–29.9 kg/m <sup>2</sup> )    | 9 (45.0) | 7 (35.0) | 16 (40.0) | 8 (40.0) | 12 (60.0) | 20 (50.0) |
| Obese (≥30.0 kg/m <sup>2</sup> )              | 5 (25.0) | 6 (30.0) | 11 (27.5) | 7 (35.0) | 5 (25.0)  | 12 (30.0) |

Data are for the all-available immunogenicity population. Data for BA.4/BA.5-adapted BNT162b2 are in a comparator group of participants from another study (NCT05472038) who were matched by age, and baseline SARS-CoV-2 status.

BMI=body mass index; NAAT=nucleic acid amplification test; N-binding=SARS-CoV-2 nucleoprotein-binding; SARS-CoV-2=severe acute respiratory syndrome coronavirus 2; SD=standard deviation.

<sup>a</sup>N was the number of participants in the specified group, or the total sample; this value was the denominator for the percentage calculations.

<sup>b</sup>n was the number of participants with the specified characteristic.

<sup>c</sup>Positive N-binding antibody result at baseline, positive NAAT result at baseline, or medical history of COVID-19.

<sup>d</sup>The inclusion criteria required the participant to have received: ≥3 prior doses of a US-authorized mRNA COVID-19 vaccine with the most recent dose being a US-authorized Omicron BA.4/BA.5-adapted vaccine ≥150 days before study vaccination (current study); 3 or 4 prior doses of 30 µg BNT162b2 with the last dose being 150–365 days before study vaccination (comparator group).

<sup>e</sup>Month was calculated as 28 days.

**Figure S1.** Serum neutralizing GMTs (95% CIs) before and 7 days after vaccination with XBB.1.5-adapted BNT162b2 30 µg or BA.4/BA.5-adapted BNT162b2 30 µg and GMFRs (95% CIs) from before to 1 week after vaccination to Omicron XBB.1.5 (**a**), EG.5.1 (**b**), and BA.2.86 (**c**). Data for BA.4/BA.5-adapted BNT162b2 are in participants from another study (ClinicalTrials.gov identifier: NCT05472038) who were matched by age, sex, and baseline SARS-CoV-2 status. Data are for the all-available immunogenicity population. Assay results <LLOQ were set to  $0.5 \times \text{LLOQ}$ . Numbers within the bars are the GMTs. 7d=7 days after vaccination; FFRNT=fluorescent focus reduction neutralization test; GMFR=geometric mean fold rise; GMT=geometric mean titer; LLOQ=lower limit of quantitation; Pre=before vaccination.



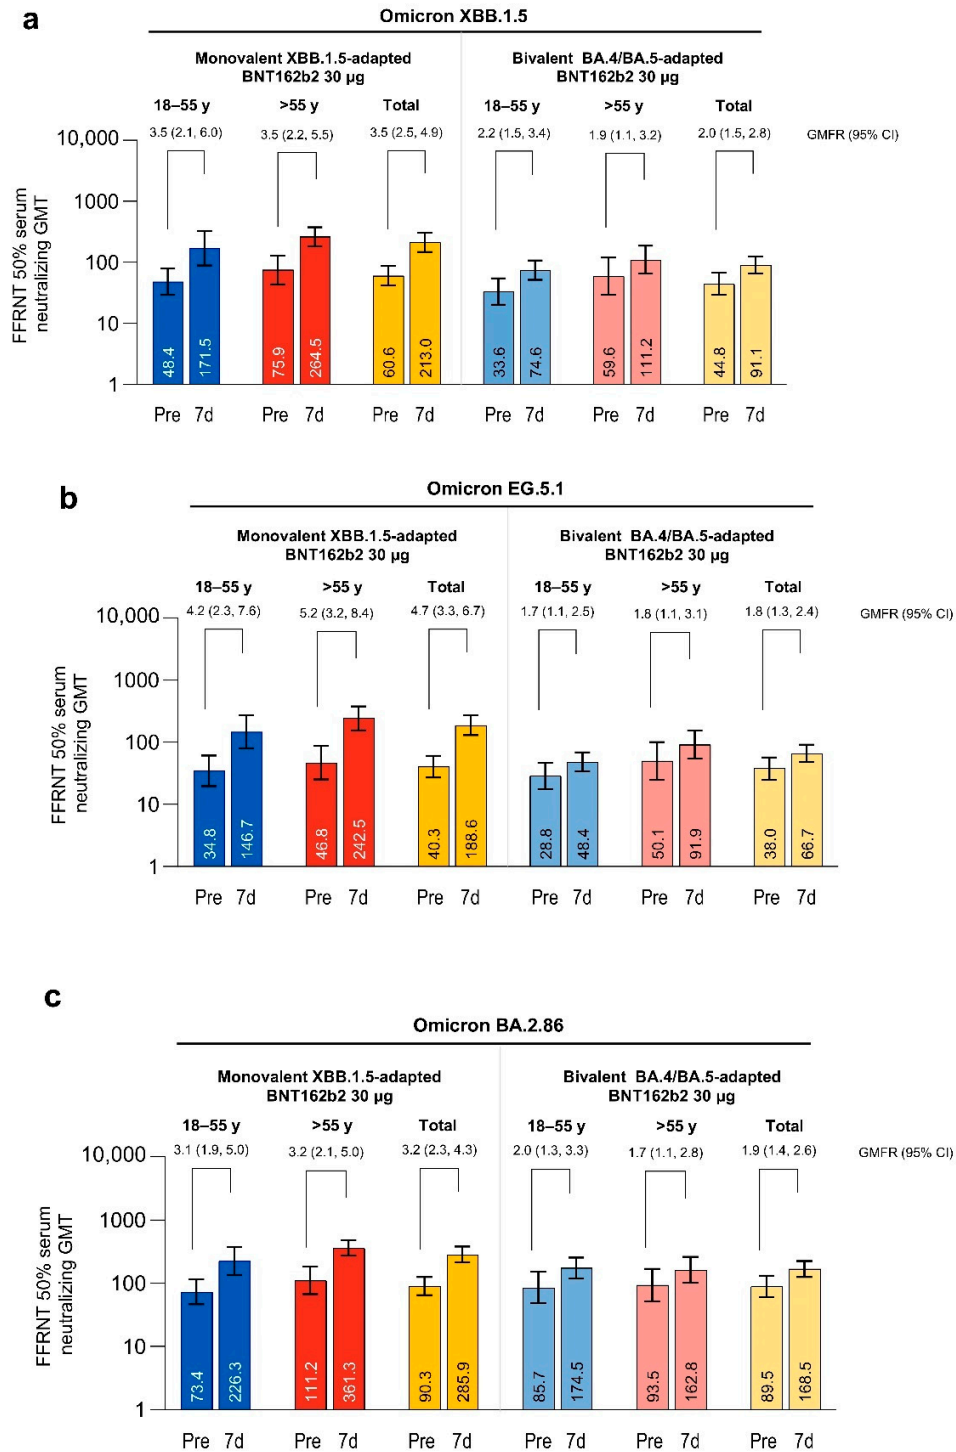

■ XBB.1.5-adapted BNT162b2 18-55 y (N=20)      ■ BA.4/BA.5-adapted BNT162b2 18-55 y (N=20)  
■ XBB.1.5-adapted BNT162b2 >55 y (N=20)      ■ BA.4/BA.5-adapted BNT162b2 >55 y (N=20)  
■ XBB.1.5-adapted BNT162b2 total (N=40)      ■ BA.4/BA.5-adapted BNT162b2 total (N=40)

**Figure S2.** Percentage of participants achieving seroresponse (95% CIs) 1 week after vaccination with XBB.1.5-adapted BNT162b2 30 µg or BA.4/BA.5-adapted BNT162b2 30 µg to Omicron XBB.1.5 (a), EG.5.1 (b), and BA.2.86 (c). Data for BA.4/BA.5-adapted BNT162b2 are in participants from another study (NCT05472038) who were matched by age, sex, and baseline SARS-CoV-2 status. Data are for the all-available immunogenicity population. Seroresponse was defined as achieving a  $\geq 4$ -fold rise from before study vaccination in FFRNT 50% serum neutralizing titers. If the baseline measurement was  $< \text{LLOQ}$ , a postvaccination assay result  $\geq 4 \times \text{LLOQ}$  was considered a seroresponse. Numbers above the bars are percentages rounded to the nearest full number. FFRNT=fluorescent focus reduction neutralization test; LLOQ=lower limit of quantitation.

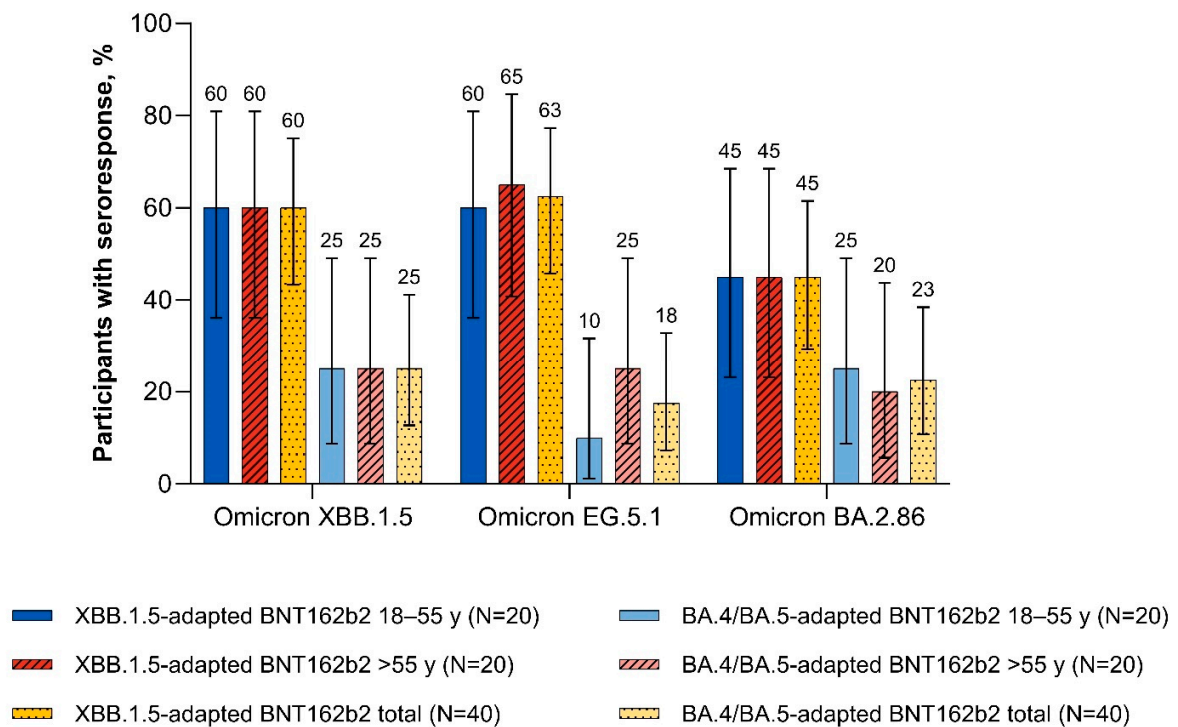

Supplement: s1 [file vaccines-2800297-supplementary.pdf › vaccines-2800297-supplementary.pdf]
